# Supplementary material for: Unique syndio-selectivity in CO/styrene copolymerization reaction catalyzed by palladium complexes with 2-(2′-oxazolinyl)-1,10-phenanthrolines
Source: Royal Society of Chemistry journal article supplement (doi:10.1039/c2dt30157a), 2012-01-01
Supplement: c2dt30157a.pdf [file c2dt30157a.pdf]

## Supplementary Information

### **Unique *syndio*-selectivity in CO/styrene copolymerization reaction by palladium complexes with 2-(2'-oxazoliny)-1,10-phenanthrolines**

Angelo Meduri,<sup>a</sup> Daniela Cozzula,<sup>b, \*</sup> Angela D'Amora,<sup>a, ¥</sup> Ennio Zangrando,<sup>a</sup> Serafino Gladiali<sup>b</sup> and Barbara Milani<sup>a, \*</sup>

<sup>a</sup>*Dipartimento di Scienze Chimiche e Farmaceutiche, Università di Trieste, Via Licio Giorgieri 1, 34127 Trieste, Italy*

<sup>b</sup>*Dipartimento di Chimica, Università di Sassari, Via Vienna 2, 07100 Sassari, Italy*

---

\* Current address: Leibniz Institute für Katalyse, A. Einstein Str. 29 a , 18059 Rostock , Germany

¥ Current address: Università di Napoli Federico II, Dipartimento di Chimica Paolo Corradini, Via Cintia, 80126 Napoli, Italy

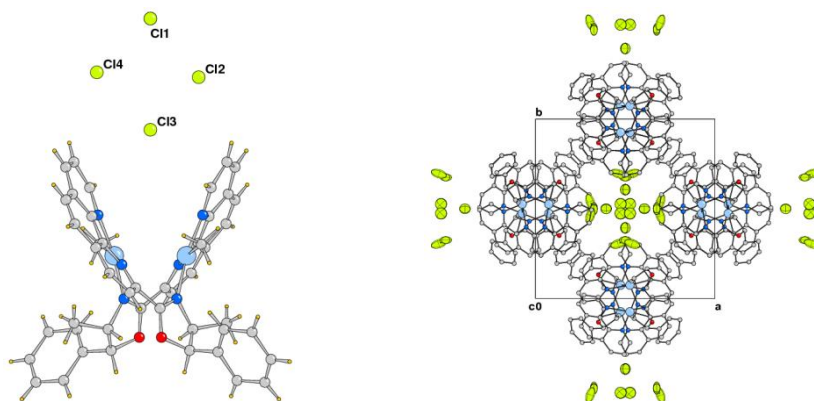

**Figure S1.** (a) Molecular structure of **3a** (chloride anions at half occupancy). (b) Crystal packing of compound **3a** viewed down axis *c*. Selected bond lengths [ $\text{\AA}$ ] and angles [ $^\circ$ ]: Pd-N(1) 2.154(18), Pd-N(2) 2.006(16), Pd-N(3') 2.013(16), Pd-C(23) 1.942(17), N(1)-Pd-N(2) 78.5(8), N(1)-Pd-N(3') 101.8(7), N(2)-Pd-N(3') 171.7(6), N(1)-Pd-C(23) 168.9(8), N(2)-Pd-C(23) 93.1(9), N(3')-Pd-C(23) 85.5(8); non-bonding Pd---Pd' interaction 3.039(4). Primed atoms at  $y, x, -z+1/3$ .

Data collection of **3a** was performed by using a Bruker Kappa CCD imaging plate mounted on a Nonius FR591 rotating anode ( $\lambda = 1.5418\text{\AA}$ ). Due to the small number of data C atoms (with the exception of the coordinated methyl group) were isotropically refined. The chlorides were found disordered over two positions at half occupancy. A void of  $464.5 \text{\AA}^3$  was detected in the unit cell and the Squeeze program (P.v.d. Sluis, A.L. Spek, Acta Crystallogr., Sect A 1990, 46, 194-201) was applied to remove the contributions of possible disordered solvent.

**Crystal data of 3a:**  $\text{C}_{46}\text{H}_{40}\text{Cl}_2\text{N}_6\text{O}_2\text{Pd}_2$ ,  $M = 992.54$ , tetragonal, space group  $P 4_122$  (No. 95),  $a = 16.527(3)$ ,  $c = 17.005(5) \text{\AA}$ ,  $V = 4644.8(18) \text{\AA}^3$ ,  $Z = 4$ ,  $\rho_{\text{calcd}} = 1.419 \text{ g/cm}^3$ ,  $\mu(\text{Cu-K}\alpha) = 7.638 \text{ mm}^{-1}$ ,  $F(000) = 2000$ . Final  $R = 0.0636$ ,  $wR2 = 0.1433$ ,  $S = 1.109$  for 169 parameters and 28058 reflections, 2988 unique [ $R(\text{int}) = 0.0535$ ], of which 1222 with  $I > 2\sigma(I)$ . Flack parameter = 0.09(5). Max positive and negative peaks in  $\Delta F$  map 0.966,  $-0.550 \text{ e \AA}^{-3}$ .

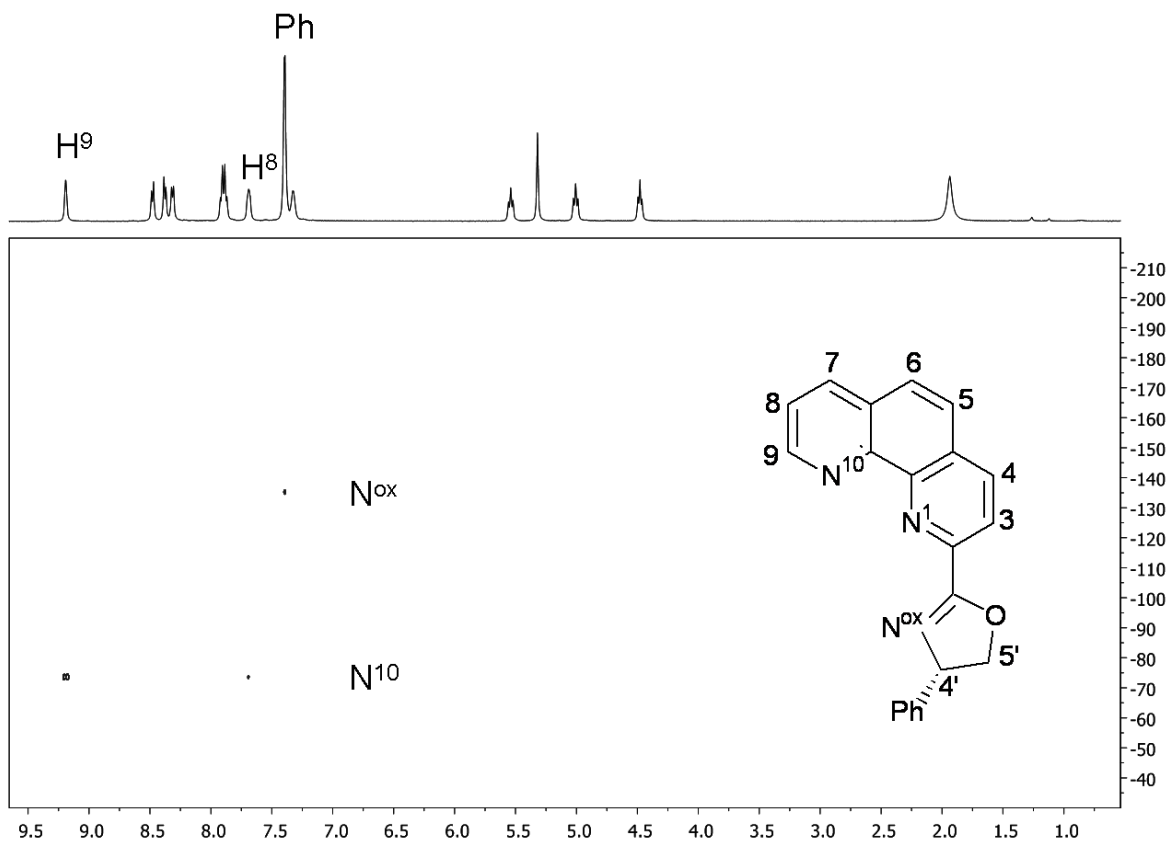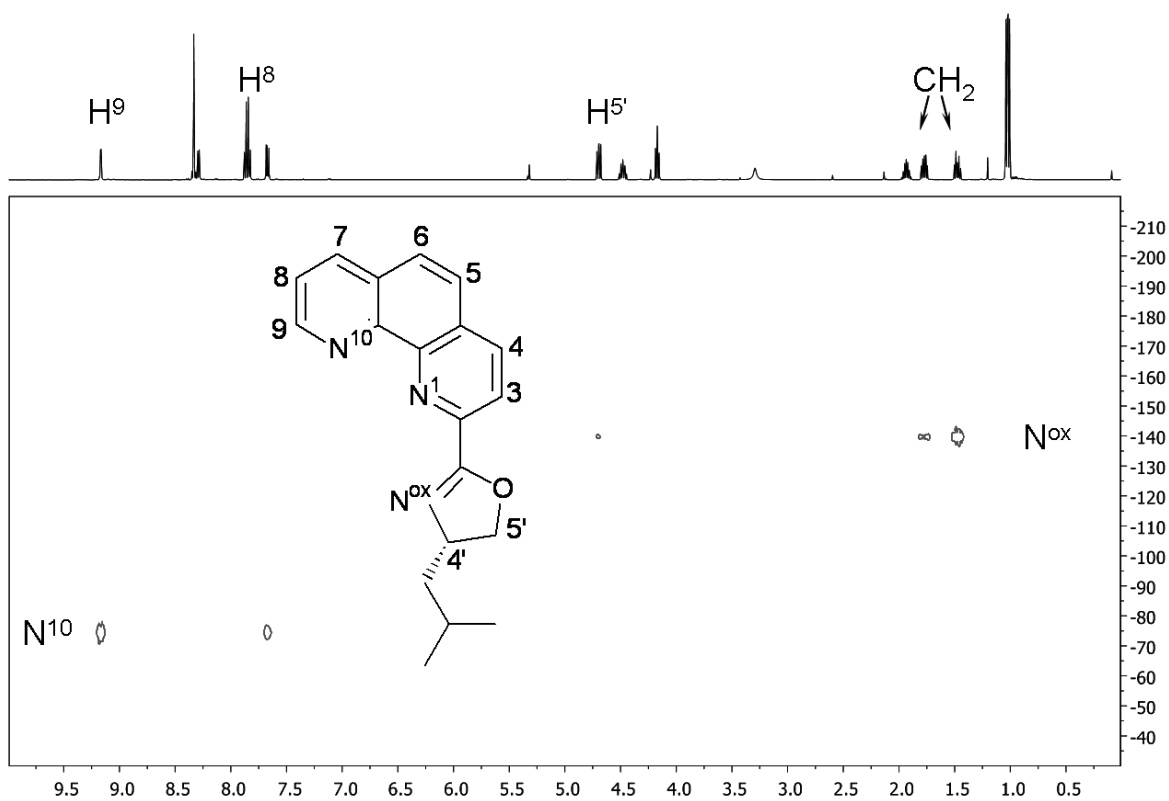

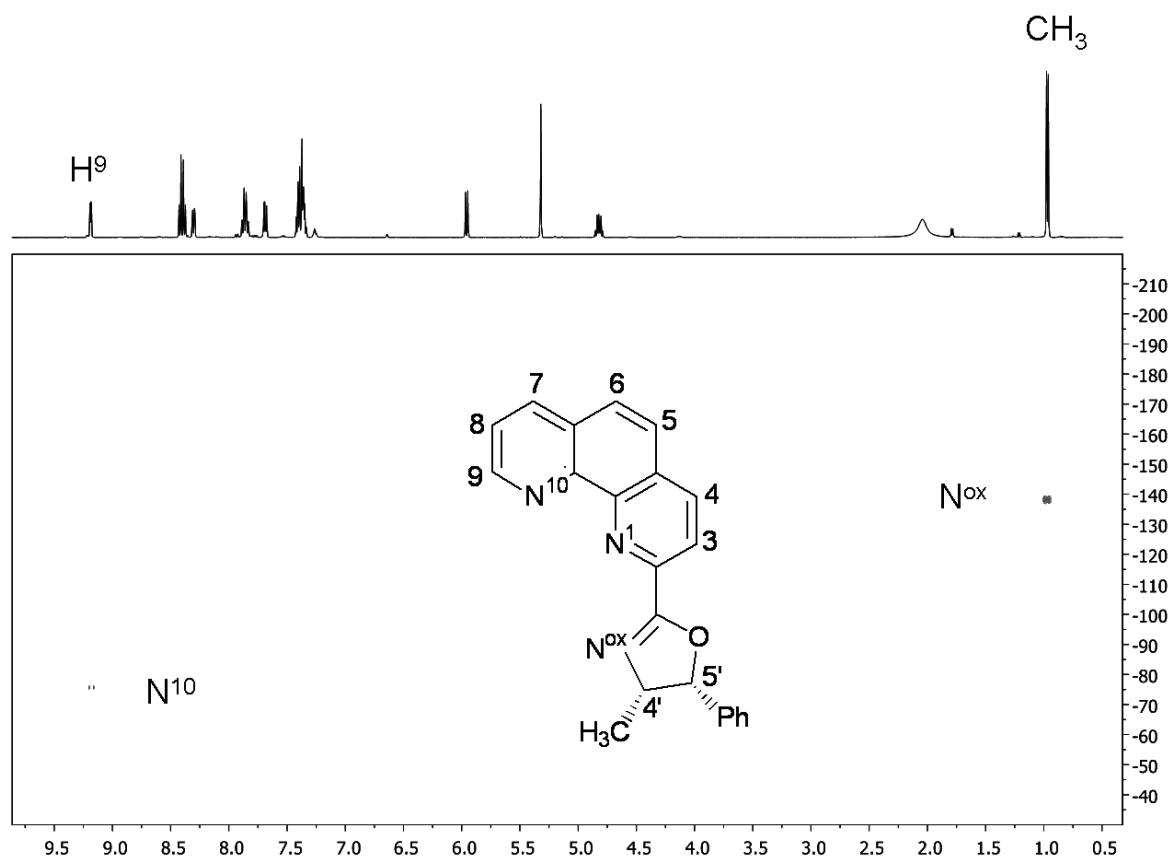

**Figure S4.**  $\{^1\text{H}, ^{15}\text{N}\}$ -HMBC NMR spectrum of **3**, in  $\text{CD}_2\text{Cl}_2$  at room temperature.

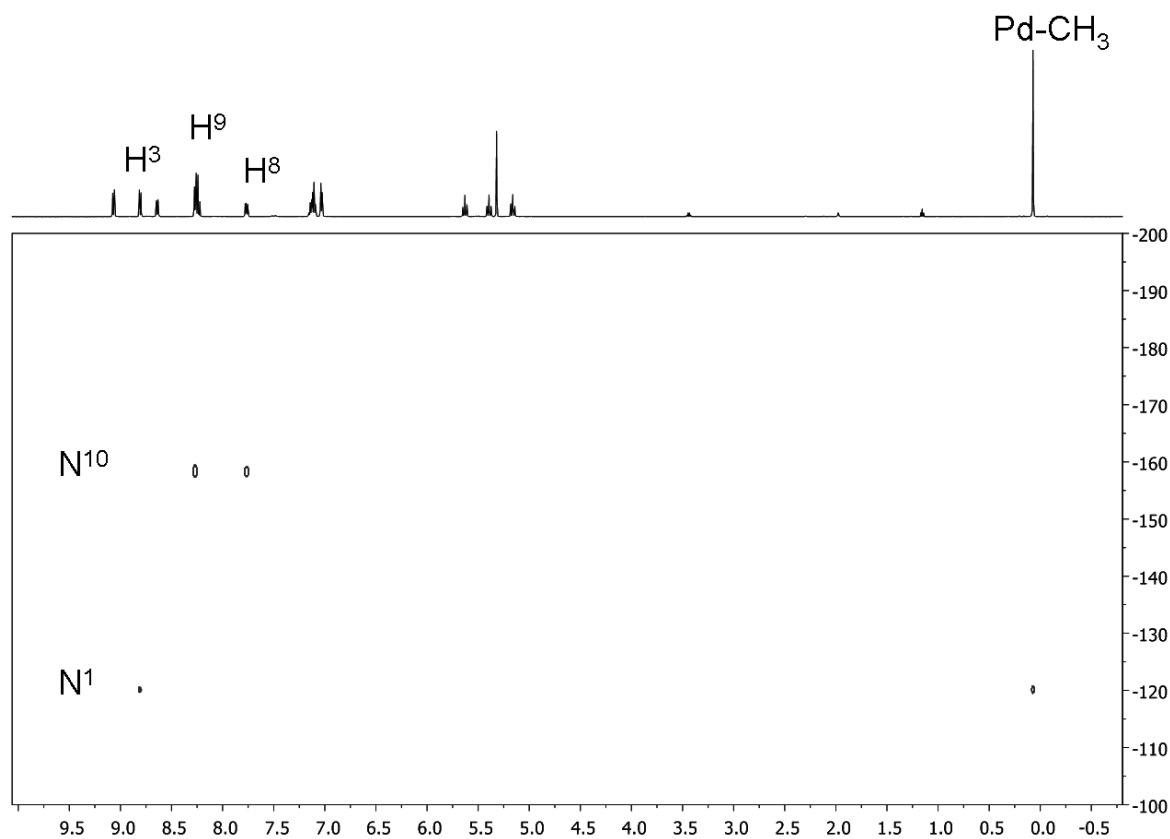

**Figure S5.**  $\{^1\text{H}, ^{15}\text{N}\}$ -HMBC NMR spectrum of **1b**, in  $\text{CD}_2\text{Cl}_2$  at room temperature.

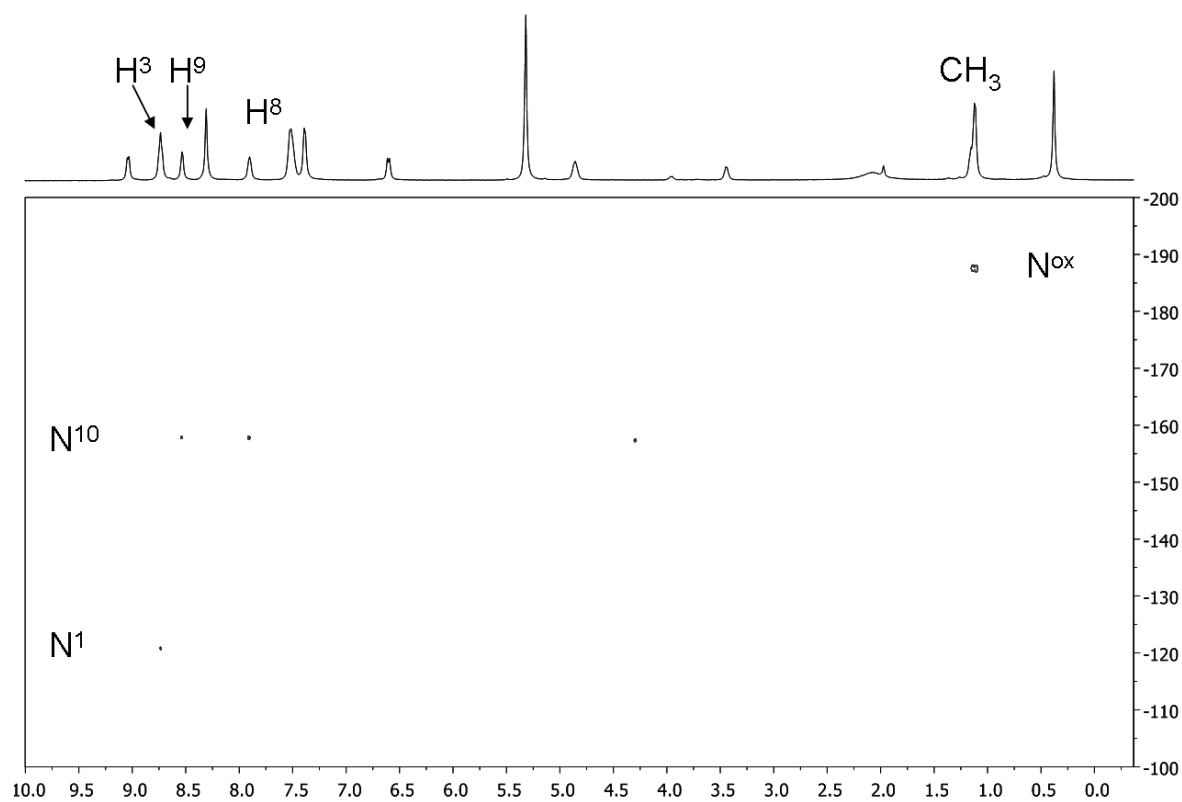

**Figure S6.**  $\{^1\text{H}, ^{15}\text{N}\}$ -HMBC NMR spectrum of **3b**, in  $\text{CD}_2\text{Cl}_2$  at room temperature.

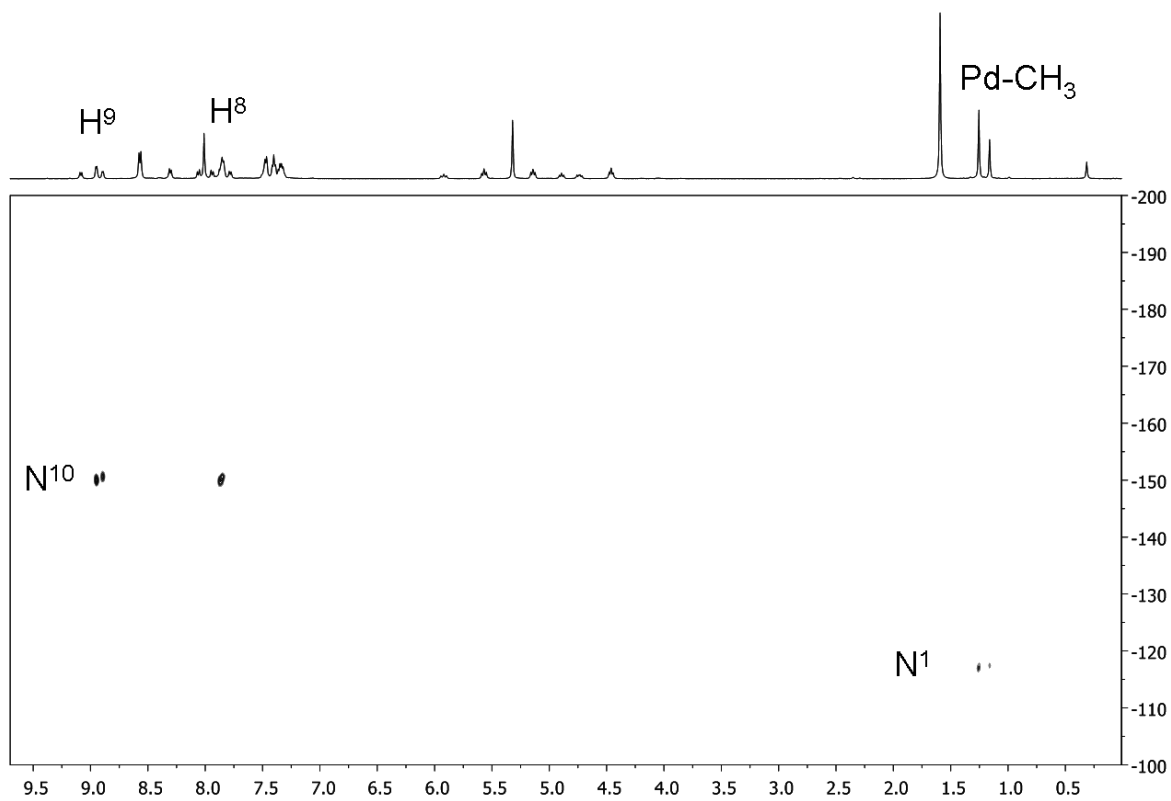

**Figure S7.**  $\{^1\text{H}, ^{15}\text{N}\}$ -HMBC NMR spectrum of **1a**, in  $\text{CD}_2\text{Cl}_2$  at room temperature.

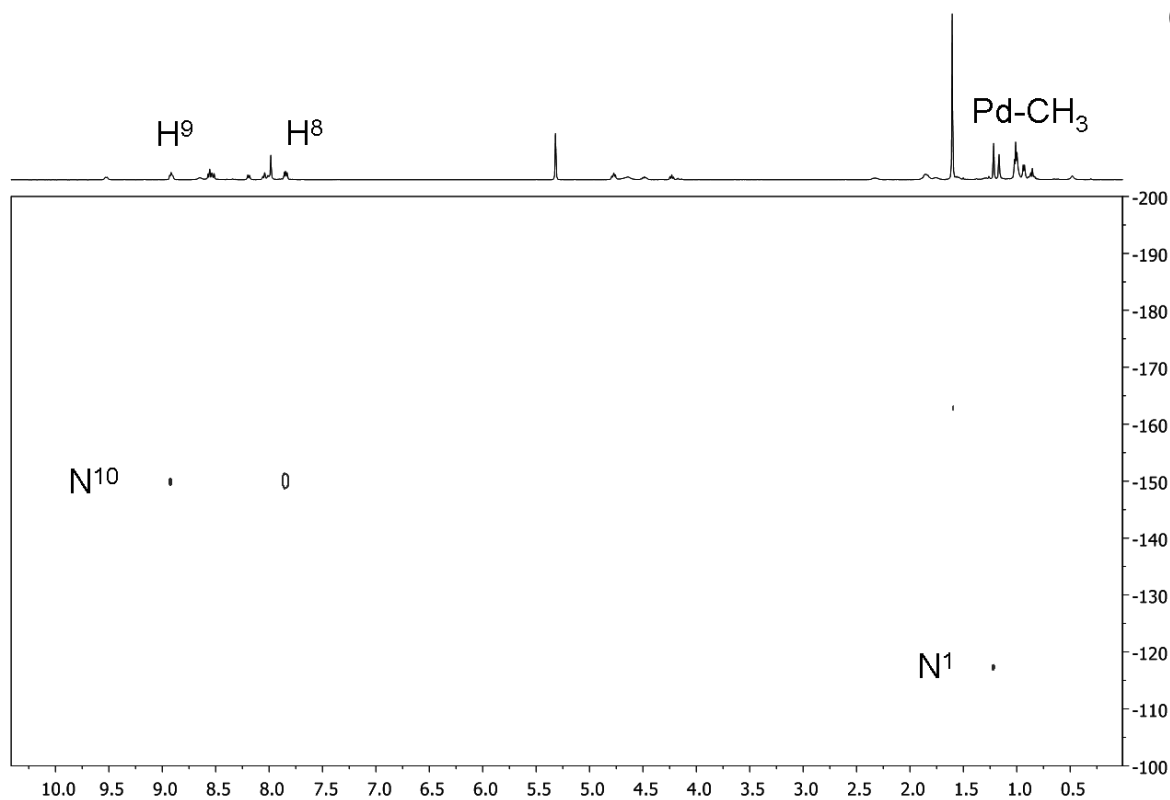

**Figure S8.**  $\{^1\text{H}, ^{15}\text{N}\}$ -HMBC NMR spectrum of **2a**, in  $\text{CD}_2\text{Cl}_2$  at room temperature.

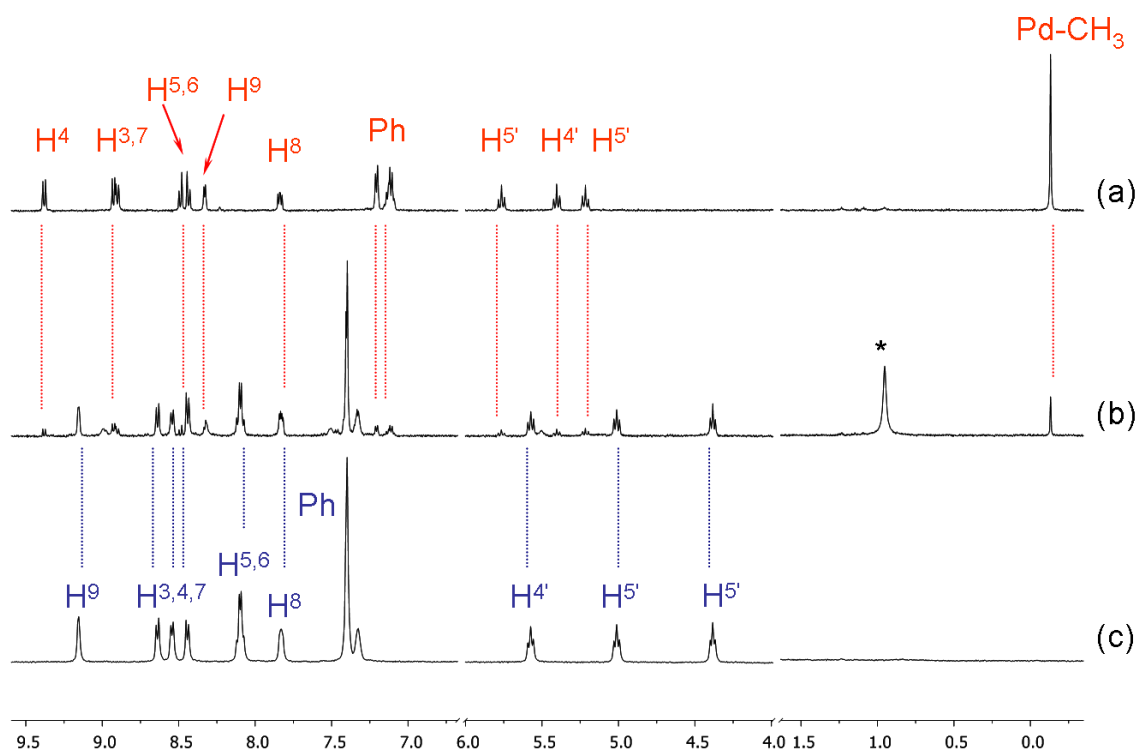

**Figure S9.**  $^1\text{H}$  NMR spectra in  $\text{dms0-d}_6$  at room temperature of: (a) **1b**; (b) **1a**; (c) **1**; (\*) signal of  $[\text{Pd}(\text{CH}_3)\text{Cl}(\text{dms0-d}_6)_2]$ .

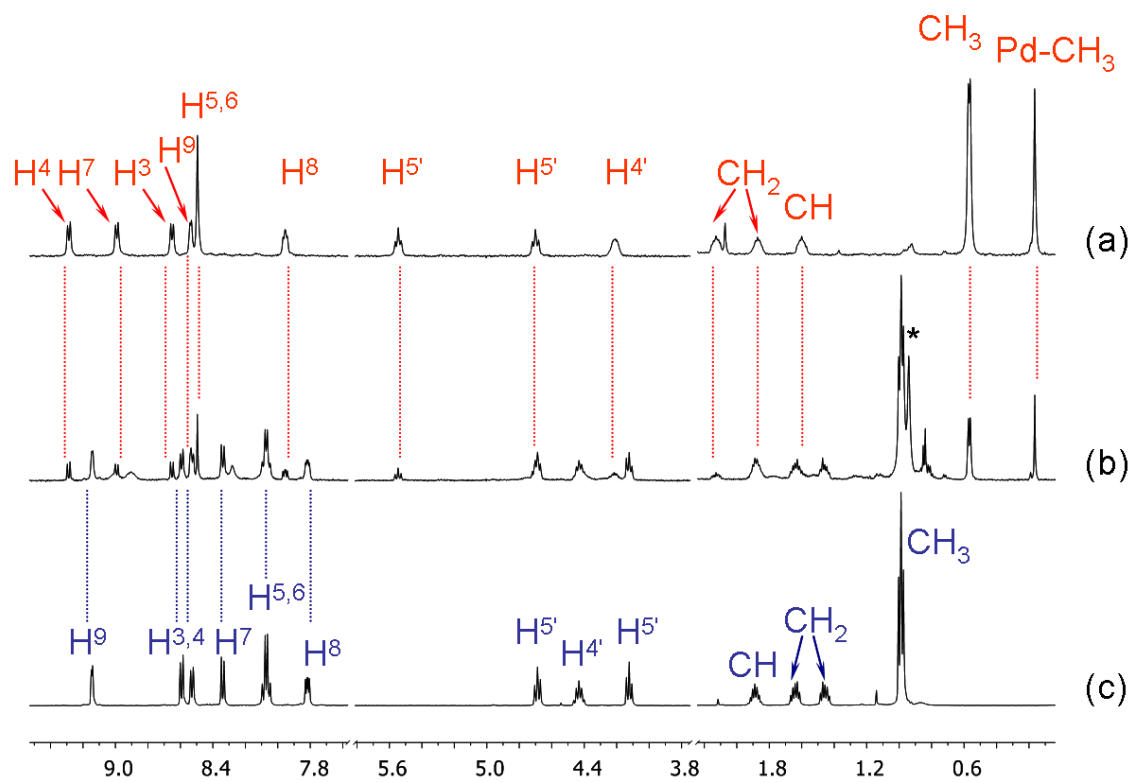

**Figure S10.**  $^1\text{H}$  NMR spectra in  $\text{dms0-d}_6$  at room temperature of: (a) **2b**; (b) **2a**; (c) **2**; (\*) signal of  $[\text{Pd}(\text{CH}_3)\text{Cl}(\text{dms0-d}_6)_2]$ .

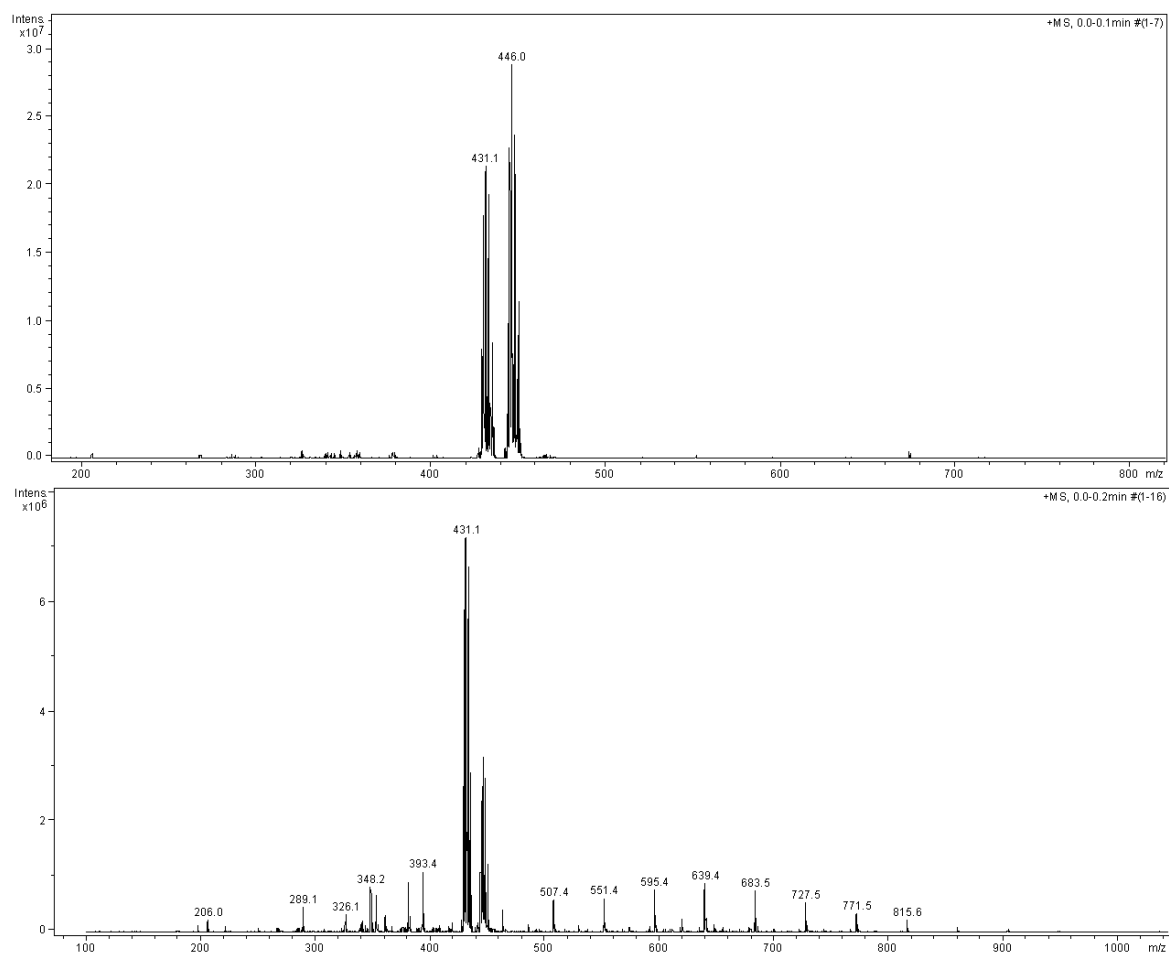

**Figure S11.** ESI-MS of: **1a** (up); **1b** (bottom).



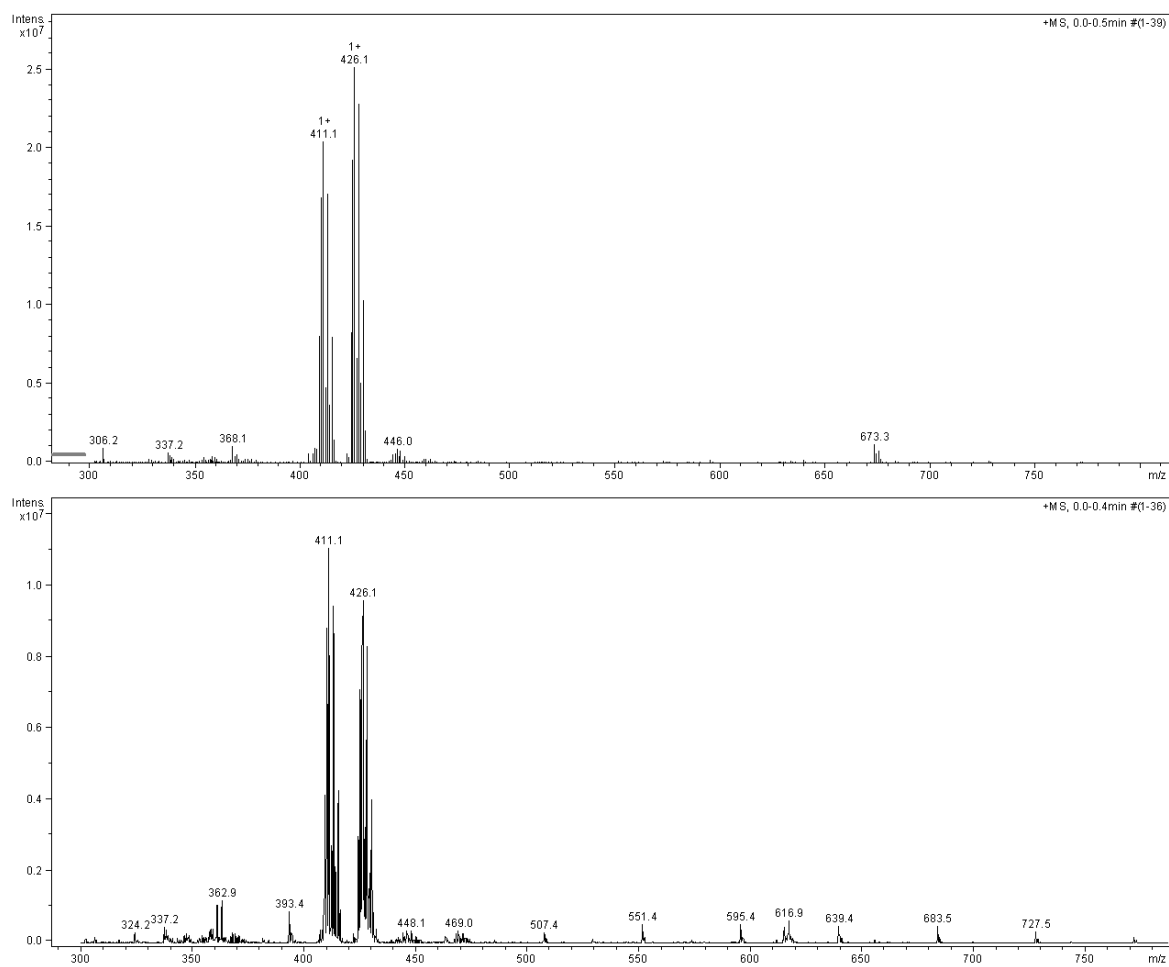

**Figure S12.** ESI-MS of: **2a** (up); **2b** (bottom).

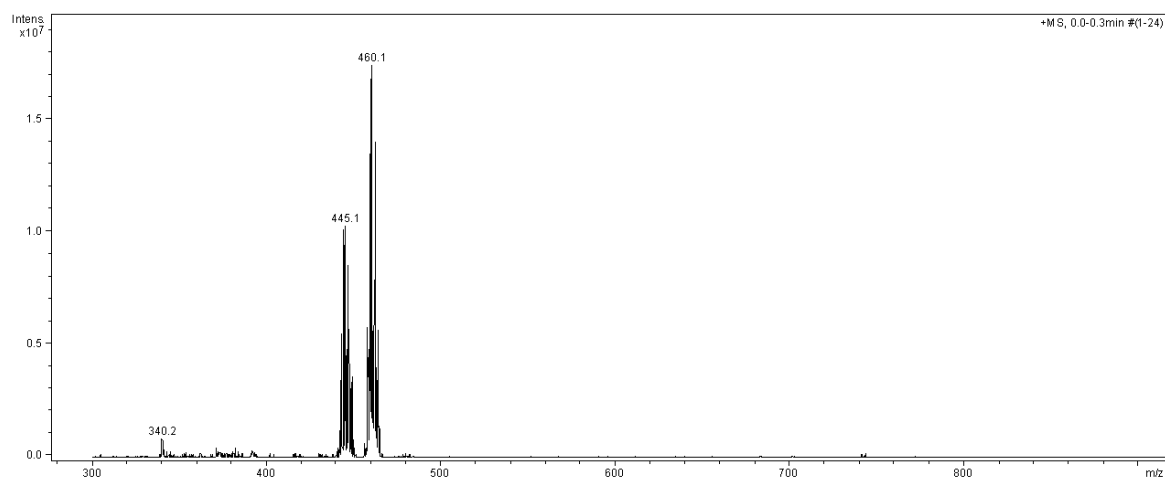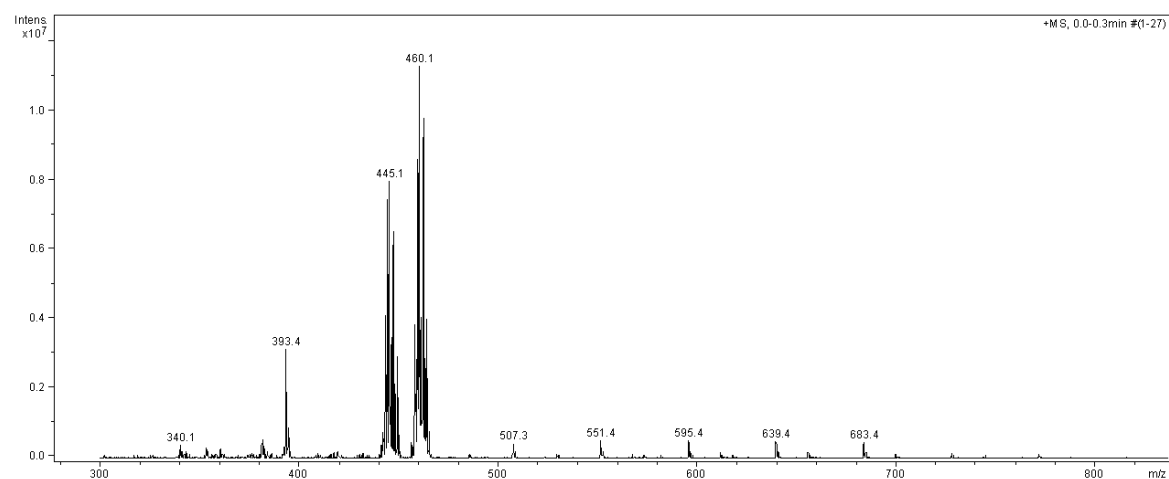

**Figure S13.** ESI-MS of: **3a** (up); **3b** (bottom).

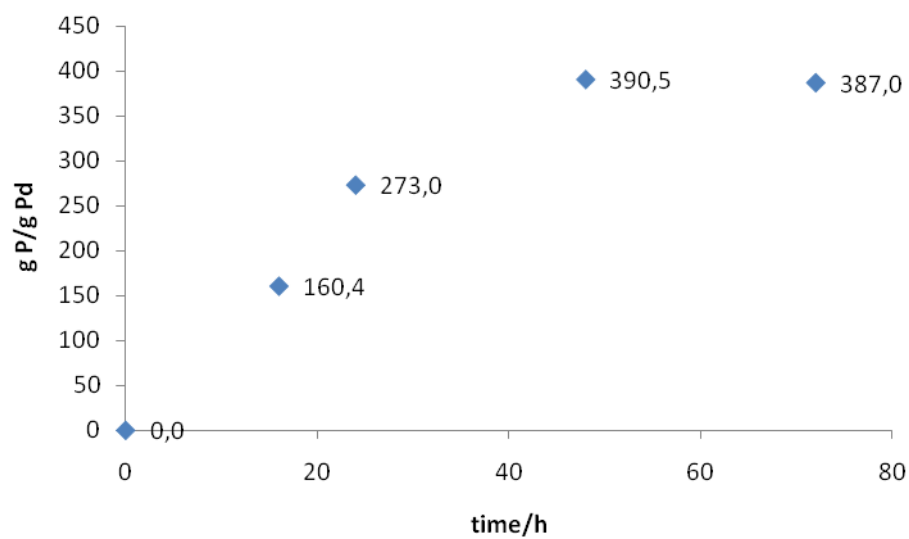

**Figure S14.** CO/styrene oligomerization: effect of reaction time.

Precatalyst: [ $\{\text{Pd}(\text{CH}_3)(\mathbf{3})\}_2[\text{PF}_6]_2$ ] **3b**

Reaction conditions:  $n_{\text{Pd}} = 1.27 \times 10^{-5}$  mol, styrene V = 10 mL, TFE V = 20 mL,  $P_{\text{CO}} = 1$  bar,  $T = 303$  K,  $[\text{BQ}]/[\text{Pd}] = 40$ ,  $[\text{styrene}]/[\text{Pd}] = 6800$ . g P/g Pd = grams of product per gram of palladium.
